# Supplementary material
Source: PubMed Central journal article supplement (PMC6981335)
Supplement: 12195_2019_602_MOESM1_ESM.pdf [file 12195_2019_602_MOESM1_ESM.pdf]

Supplemental Table S1. Functional annotation of genes significantly correlated with CCN4 expression in 56 melanoma cell lines associated with the Cancer Cell Line Encyclopedia. Adjusted p-values are reported for functional annotation. A Fisher Exact test p-value adjusted for multiple hypothesis testing indicated whether gene expression was differentially associated with an increase in CCN4 expression. DAVID (<http://david.ncicrf.gov>) was used for functional annotation.

| KEGG_PATHWAY: DNA Replication |                          |                     | KEGG_PATHWAY: Cell Cycle |                          |                     | Transcription Factors and Cell interaction Genes |                          |                     | KEGG_PATHWAY: PI3K-Akt Signaling |                          |                     | UP_KEYWORD: Extracellular Matrix |                          |                     |
|-------------------------------|--------------------------|---------------------|--------------------------|--------------------------|---------------------|--------------------------------------------------|--------------------------|---------------------|----------------------------------|--------------------------|---------------------|----------------------------------|--------------------------|---------------------|
| BH Adj p-value                | 2.30E-06                 |                     | BH Adj p-value           | 1.30E-02                 |                     |                                                  |                          |                     | BH Adj p-value                   | 1.90E-04                 |                     | BH Adj p-value                   | 1.30E-21                 |                     |
| Gene_Symbol                   | Adj Fisher Exact P-value | Correlation w/ CCN4 | Gene_Symbol              | Adj Fisher Exact P-value | Correlation w/ CCN4 | Gene_Symbol                                      | Adj Fisher Exact P-value | Correlation w/ CCN4 | Gene_Symbol                      | Adj Fisher Exact P-value | Correlation w/ CCN4 | Gene_Symbol                      | Adj Fisher Exact P-value | Correlation w/ CCN4 |
| FEN1                          | 1.11E-04                 | -0.239              | CCNB1                    | 2.23E-02                 | -0.181              | CEACAM1                                          | 2.84E-05                 | -0.147              | CHRM2                            | 1.36E-04                 | 0.042               | ADAMTS1                          | 1.61E-05                 | 0.148               |
| MCM3                          | 1.42E-06                 | -0.239              | CCNB2                    | 1.00E-02                 | -0.112              | CGN                                              | 3.69E-07                 | -0.130              | COL1A1                           | 1.36E-04                 | 0.151               | ADAMTS10                         | 1.36E-04                 | 0.151               |
| MCM4                          | 1.61E-05                 | -0.233              | CCNE1                    | 4.41E-05                 | -0.233              | MITF                                             | 4.89E-04                 | -0.255              | COL1A2                           | 2.18E-06                 | 0.629               | ADAMTS12                         | 2.18E-06                 | 0.629               |
| MCM6                          | 3.46E-04                 | -0.188              | CDC25A                   | 4.66E-06                 | -0.272              | NRCAM                                            | 7.67E-04                 | -0.175              | COL3A1                           | 3.46E-04                 | 0.176               | ADAMTS2                          | 3.46E-04                 | 0.176               |
| MCM7                          | 1.42E-06                 | -0.285              | CDC45                    | 3.69E-07                 | -0.256              | CDH11                                            | 4.54E-05                 | 0.180               | COL5A1                           | 3.33E-04                 | 0.166               | ADAMTS5                          | 3.33E-04                 | 0.166               |
| PCNA                          | 1.36E-04                 | -0.195              | CDC6                     | 1.42E-06                 | -0.291              | FN1                                              | 1.42E-05                 | 0.233               | COL6A1                           | 2.44E-09                 | 0.077               | ADAMTS6                          | 2.44E-09                 | 0.077               |
| POLA1                         | 1.42E-06                 | -0.176              | CDC7                     | 3.46E-04                 | -0.224              | VIM                                              | 1.07E-02                 | 0.411               | COL6A2                           | 1.36E-04                 | 0.294               | ADAMTS7                          | 1.36E-04                 | 0.294               |
| POLD1                         | 1.11E-04                 | -0.145              | CDCA5                    | 1.06E-05                 | -0.290              | ZEB1                                             | 1.21E-04                 | 0.678               | COL6A3                           | 1.42E-06                 | 0.308               | ADAMTSL1                         | 1.42E-06                 | 0.308               |
| POLD2                         | 3.46E-04                 | 0.017               | CDCA7                    | 1.61E-05                 | -0.142              |                                                  |                          |                     | COMP                             | 4.66E-06                 | 0.233               | ADAMTSL4                         | 4.66E-06                 | 0.233               |
| POLE                          | 2.43E-04                 | -0.261              | CDK1                     | 2.07E-03                 | -0.247              |                                                  |                          |                     | CREB3L1                          | 8.31E-08                 | 0.404               | ASPN                             | 1.16E-07                 | 0.215               |
| PRIM1                         | 3.69E-07                 | -0.257              | CDK2                     | 4.41E-05                 | -0.189              |                                                  |                          |                     | EGFR                             | 7.67E-04                 | 0.135               | BGN                              | 1.61E-05                 | 0.262               |
| RFC2                          | 4.42E-06                 | -0.291              | CDK4                     | 3.33E-04                 | -0.109              |                                                  |                          |                     | FGF2                             | 1.61E-05                 | 0.169               | CCDC80                           | 2.84E-05                 | 0.191               |
| RFC3                          | 4.42E-06                 | -0.259              | CDK5                     | 4.54E-05                 | -0.199              |                                                  |                          |                     | FGF5                             | 2.18E-06                 | 0.106               | COL12A1                          | 4.66E-06                 | 0.209               |
| RFC4                          | 4.54E-05                 | -0.201              | CUL1                     | 3.33E-04                 | -0.212              |                                                  |                          |                     | FGF7                             | 1.11E-04                 | 0.177               | COL1A1                           | 1.61E-05                 | 0.280               |
| RFC5                          | 3.69E-07                 | -0.289              | DBF4                     | 4.42E-06                 | -0.283              |                                                  |                          |                     | FN1                              | 1.11E-04                 | 0.365               | COL1A2                           | 1.11E-04                 | 0.365               |
| RPA2                          | 1.61E-05                 | -0.182              | E2F1                     | 1.11E-04                 | -0.219              |                                                  |                          |                     | GNGT2                            | 1.21E-04                 | 0.370               | COL3A1                           | 4.42E-06                 | 0.270               |
| RPA3                          | 3.46E-04                 | -0.102              | E2F2                     | 4.54E-05                 | -0.231              |                                                  |                          |                     | HGF                              | 4.41E-05                 | 0.041               | COL5A1                           | 4.66E-06                 | 0.395               |
| SSBP1                         | 3.33E-04                 | -0.205              | E2F3                     | 3.46E-04                 | -0.226              |                                                  |                          |                     | IL6                              | 7.67E-04                 | 0.025               | COL6A1                           | 4.66E-06                 | 0.656               |
|                               |                          |                     | EP300                    | 4.66E-06                 | -0.168              |                                                  |                          |                     | ITGA11                           | 1.36E-04                 | 0.463               | COL6A2                           | 9.87E-07                 | 0.691               |
|                               |                          |                     | ESPL1                    | 1.42E-06                 | -0.339              |                                                  |                          |                     | ITGA5                            | 1.21E-04                 | 0.305               | COL6A3                           | 4.54E-05                 | 0.172               |
|                               |                          |                     | HDAC1                    | 1.36E-04                 | -0.183              |                                                  |                          |                     | ITGA8                            | 1.61E-05                 | 0.133               | COL8A1                           | 3.33E-04                 | 0.111               |
|                               |                          |                     | MAD1L1                   | 4.54E-05                 | -0.116              |                                                  |                          |                     | ITGAV                            | 9.09E-04                 | 0.290               | COMP                             | 1.42E-06                 | 0.171               |
|                               |                          |                     | MCM3                     | 1.42E-06                 | -0.239              |                                                  |                          |                     | ITGB1                            | 3.69E-07                 | 0.367               | CPZ                              | 4.54E-05                 | 0.502               |
|                               |                          |                     | MCM4                     | 1.61E-05                 | -0.233              |                                                  |                          |                     | JAK1                             | 1.36E-04                 | 0.190               | CTGF                             | 1.61E-05                 | 0.163               |
|                               |                          |                     | MCM5                     | 2.07E-03                 | -0.185              |                                                  |                          |                     | LAMB2                            | 4.54E-05                 | 0.115               | DCN                              | 4.54E-05                 | 0.115               |
|                               |                          |                     | MCM6                     | 3.46E-04                 | -0.188              |                                                  |                          |                     | LAMC2                            | 9.11E-05                 | 0.968               | DPT                              | 9.11E-05                 | 0.968               |
|                               |                          |                     | MCM7                     | 1.42E-06                 | -0.285              |                                                  |                          |                     | LPAR1                            | 9.11E-05                 | 0.301               | ECM2                             | 1.36E-04                 | 0.358               |
|                               |                          |                     | ORC1                     | 4.42E-06                 | -0.242              |                                                  |                          |                     | MAPK3                            | 3.46E-04                 | 0.113               | EFEMP1                           | 1.11E-04                 | 0.162               |
|                               |                          |                     | ORC5                     | 1.36E-04                 | -0.250              |                                                  |                          |                     | NGF                              | 4.54E-05                 | 0.130               | ELN                              | 1.06E-05                 | 0.179               |
|                               |                          |                     | ORC6                     | 1.11E-04                 | -0.311              |                                                  |                          |                     | PDGFC                            | 1.61E-05                 | 0.372               | FBLN2                            | 4.42E-06                 | 0.291               |
|                               |                          |                     | PCNA                     | 1.36E-04                 | -0.195              |                                                  |                          |                     | PDGFRA                           | 1.19E-05                 | 0.283               | FBN1                             | 3.69E-07                 | 0.323               |
|                               |                          |                     | PKMYT1                   | 4.41E-05                 | -0.281              |                                                  |                          |                     | PDGFRB                           | 4.54E-05                 | 0.538               | FBN2                             | 9.09E-04                 | 0.117               |
|                               |                          |                     | PTTG1                    | 1.96E-08                 | -0.253              |                                                  |                          |                     | TEK                              | 4.41E-05                 | 0.148               | FN1                              | 1.42E-05                 | 0.245               |
|                               |                          |                     |                          |                          |                     |                                                  |                          |                     | THBS1                            | 1.21E-04                 | 0.194               | FREM3                            | 7.67E-04                 | 0.040               |
|                               |                          |                     |                          |                          |                     |                                                  |                          |                     | TNXB                             | 9.11E-05                 | 0.114               | HSPG2                            | 9.11E-05                 | 0.114               |
|                               |                          |                     |                          |                          |                     |                                                  |                          |                     | VEGFC                            | 1.96E-08                 | 0.354               | LAMB2                            | 1.61E-05                 | 0.382               |
|                               |                          |                     |                          |                          |                     |                                                  |                          |                     |                                  |                          |                     | LAMC2                            | 1.42E-06                 | -0.023              |
|                               |                          |                     |                          |                          |                     |                                                  |                          |                     |                                  |                          |                     | LOXL2                            | 8.98E-04                 | 0.278               |
|                               |                          |                     |                          |                          |                     |                                                  |                          |                     |                                  |                          |                     | LTBP2                            | 4.42E-06                 | 0.320               |
|                               |                          |                     |                          |                          |                     |                                                  |                          |                     |                                  |                          |                     | LUM                              | 9.11E-05                 | 0.227               |
|                               |                          |                     |                          |                          |                     |                                                  |                          |                     |                                  |                          |                     | MFAP4                            | 9.87E-07                 | 0.573               |
|                               |                          |                     |                          |                          |                     |                                                  |                          |                     |                                  |                          |                     | MFAP5                            | 1.06E-05                 | 0.210               |
|                               |                          |                     |                          |                          |                     |                                                  |                          |                     |                                  |                          |                     | MMP19                            | 1.42E-06                 | 0.443               |
|                               |                          |                     |                          |                          |                     |                                                  |                          |                     |                                  |                          |                     | MMP2                             | 1.21E-04                 | 0.725               |
|                               |                          |                     |                          |                          |                     |                                                  |                          |                     |                                  |                          |                     | NID2                             | 8.31E-08                 | 0.105               |
|                               |                          |                     |                          |                          |                     |                                                  |                          |                     |                                  |                          |                     | PODN                             | 1.06E-05                 | 0.187               |
|                               |                          |                     |                          |                          |                     |                                                  |                          |                     |                                  |                          |                     | PODNL1                           | 3.46E-04                 | 0.496               |
|                               |                          |                     |                          |                          |                     |                                                  |                          |                     |                                  |                          |                     | POSTN                            | 1.11E-04                 | 0.199               |
|                               |                          |                     |                          |                          |                     |                                                  |                          |                     |                                  |                          |                     | PXDN                             | 1.19E-05                 | 0.362               |
|                               |                          |                     |                          |                          |                     |                                                  |                          |                     |                                  |                          |                     | SPOCK1                           | 6.55E-04                 | 0.176               |
|                               |                          |                     |                          |                          |                     |                                                  |                          |                     |                                  |                          |                     | SPON1                            | 4.54E-05                 | 0.189               |
|                               |                          |                     |                          |                          |                     |                                                  |                          |                     |                                  |                          |                     | TNXB                             | 3.69E-07                 | 0.144               |
|                               |                          |                     |                          |                          |                     |                                                  |                          |                     |                                  |                          |                     | VCAN                             | 6.55E-04                 | 0.336               |
|                               |                          |                     |                          |                          |                     |                                                  |                          |                     |                                  |                          |                     | WNT2                             | 1.42E-06                 | 0.101               |
|                               |                          |                     |                          |                          |                     |                                                  |                          |                     |                                  |                          |                     | WNT5B                            | 4.42E-06                 | 0.313               |
