# Supplementary material
Source: PubMed Central journal article supplement (PMC6981335)
Supplement: 12195_2019_602_MOESM2_ESM.pdf [file 12195_2019_602_MOESM2_ESM.pdf]

**A**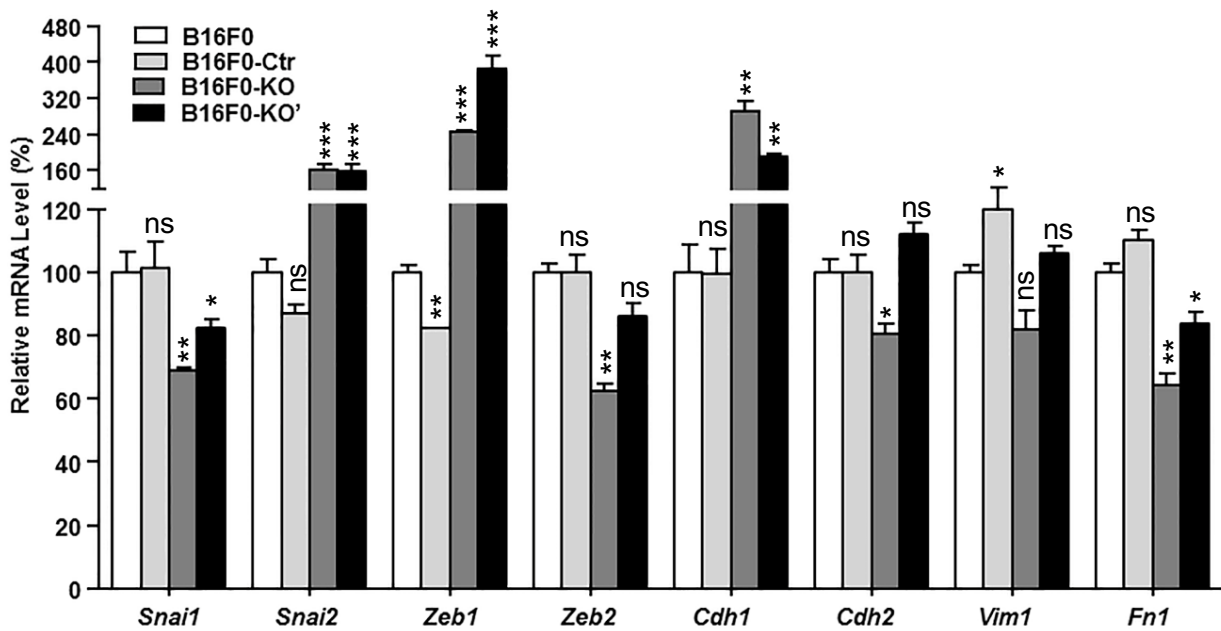**B**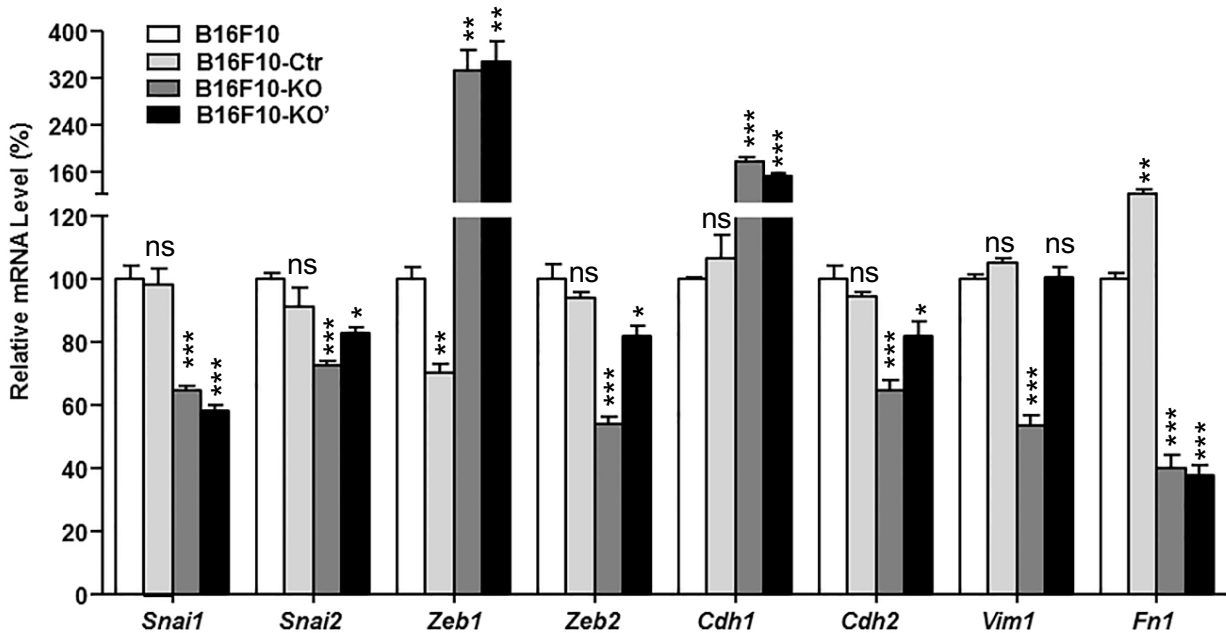

**Supplementary Figure S1. Knockout of *Ccn4* in mouse melanoma B16 cells represses EMT gene expression.** mRNA expression of certain EMT-associated transcription factors and EMT marker genes were compared among two knockout cells (-KO and KO') and control cells (-Ctr) from B16F0 (A) and B16F10 (B). \*: pvalue < 0.05; \*\*: p-value < 0.01; \*\*\*: p-value < 0.001; and ns: not significant.
