# Supplementary material
Source: PubMed Central journal article supplement (PMC6981335)
Supplement: 12195_2019_602_MOESM7_ESM.pdf [file 12195_2019_602_MOESM7_ESM.pdf]

**A****B16F10****B16F10 DN CCN4 KO 1**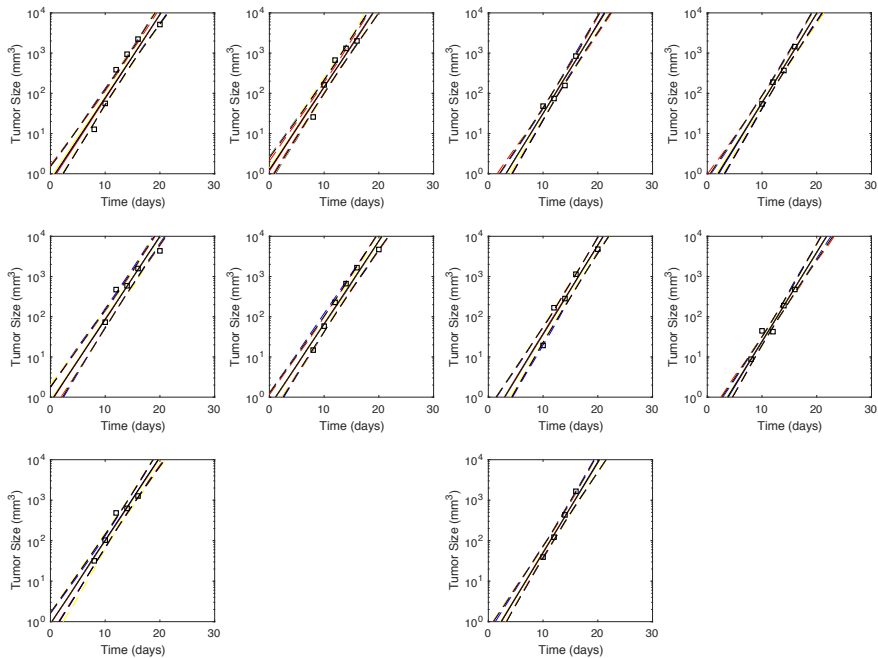

NSG

**B****B16F10****B16F10 DN CCN4 KO 1**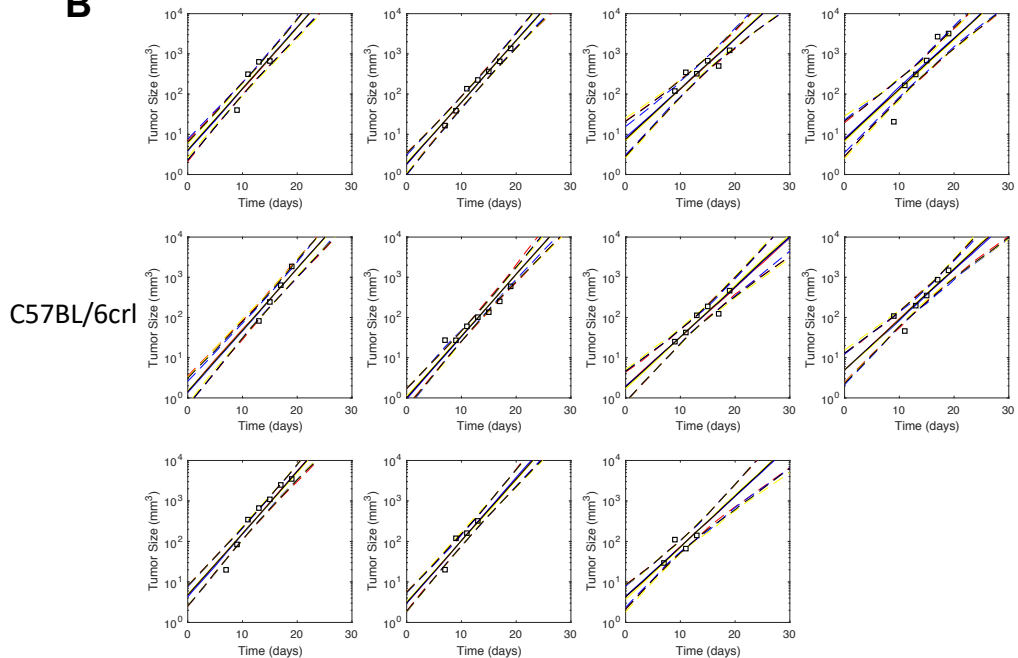

C57BL/6Nrl

**Supplementary Figure S6. The tumor growth modeling in mice with subcutaneous injection of B16F10 or its *Ccn4* Double Nickase knockout cells.** Measures of tumor size at different days (squares) was compared to the posterior distribution in the model predictions (solid line corresponds to maximum in the distribution while dotted lines enclose 95% of the distribution) for each mouse in the cohort. B16F0 cells (left subpanels) and *Ccn4* KO B16F0 cells (right subpanels) were injected into NSG mice (A) or into C57BL/6Nrl mice (B).
