# Supplementary material
Source: PubMed Central journal article supplement (PMC6981335)
Supplement: 12195_2019_602_MOESM9_ESM.pdf [file 12195_2019_602_MOESM9_ESM.pdf]

**A**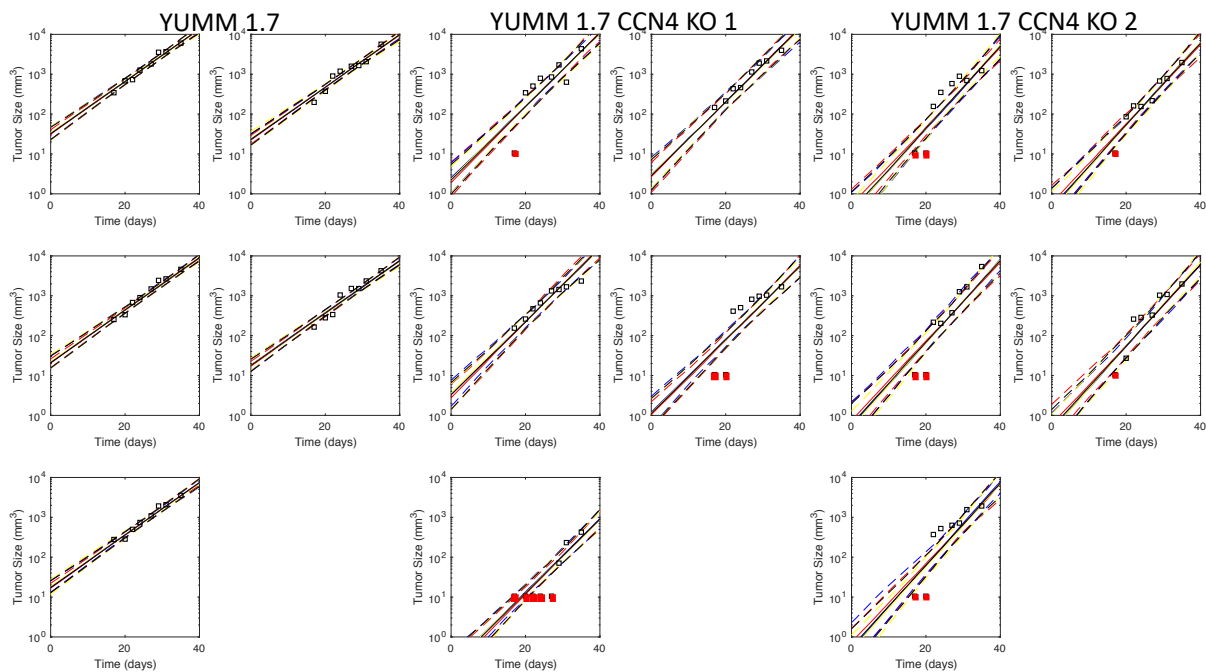

NSG

**B**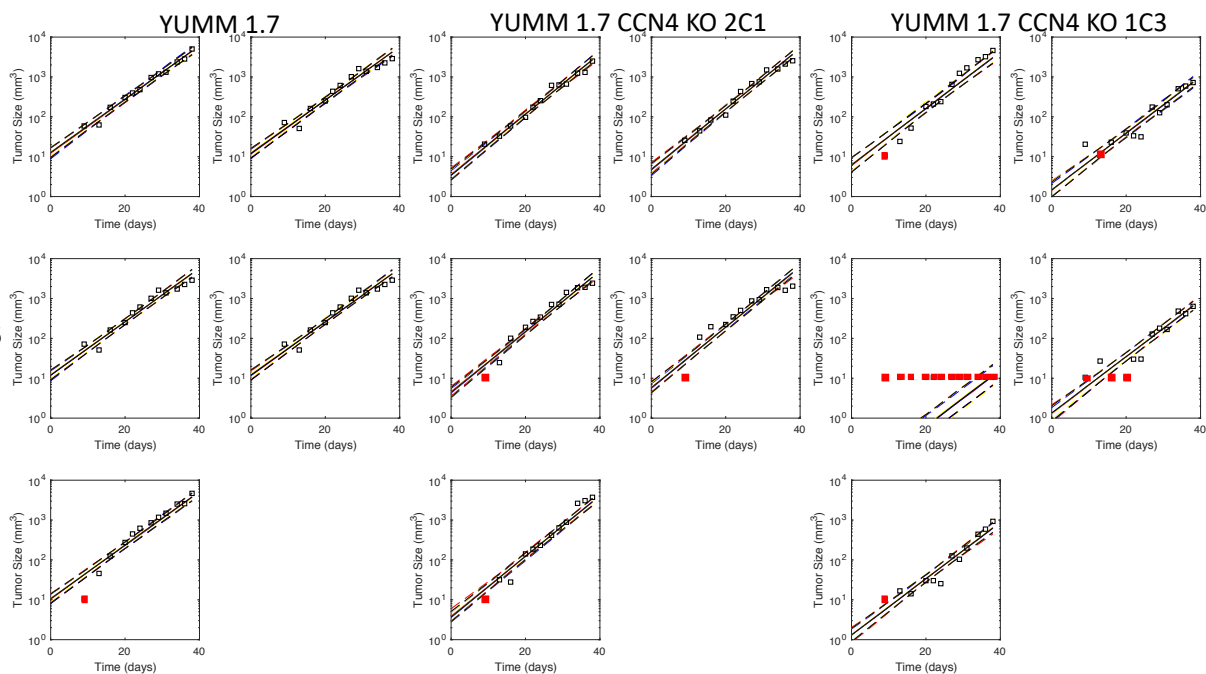

C57BL/6

**Supplementary Figure S8. The tumor growth modeling in mice with subcutaneous injection of YUMM1.7 or its *Ccn4* Double Nickase knockout cells.** Measures of tumor size at different days (squares) was compared to the posterior distribution in the model predictions (solid line corresponds to maximum in the distribution while dotted lines enclose 95% of the distribution) for each mouse in the cohort. YUMM1.7 cells (left subpanels) and *Ccn4* KO YUMM1.7 cells (middle and right subpanels) were injected into NSG mice (A) or into C57BL/6Nrl mice (B). Red squares indicate that the tumor was too small to be measured.
